# Supplementary material
Source: Springer Nature journal article supplement (https://www.springermedizin.de/resource/supplementary/12879_2008_874_MOESM5_ESM.pdf/9449542)

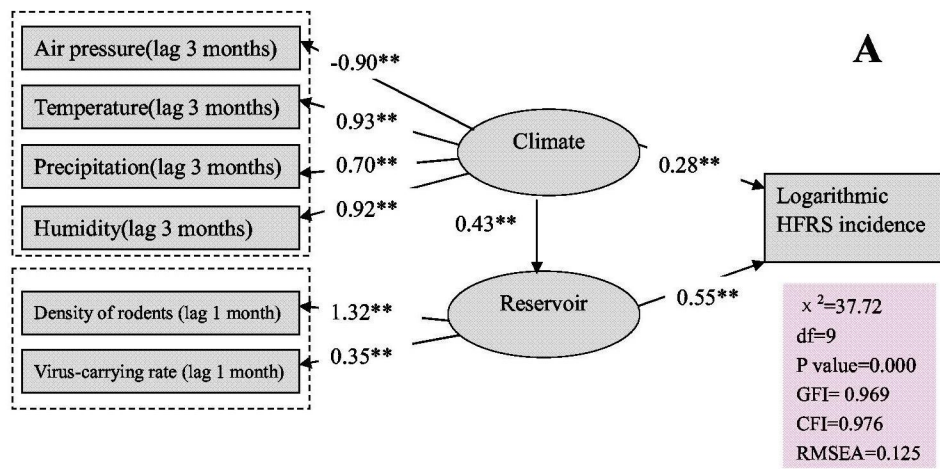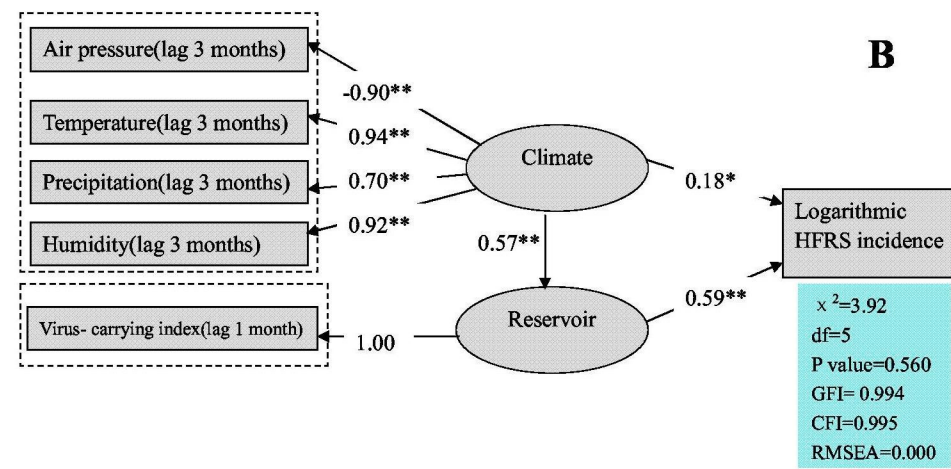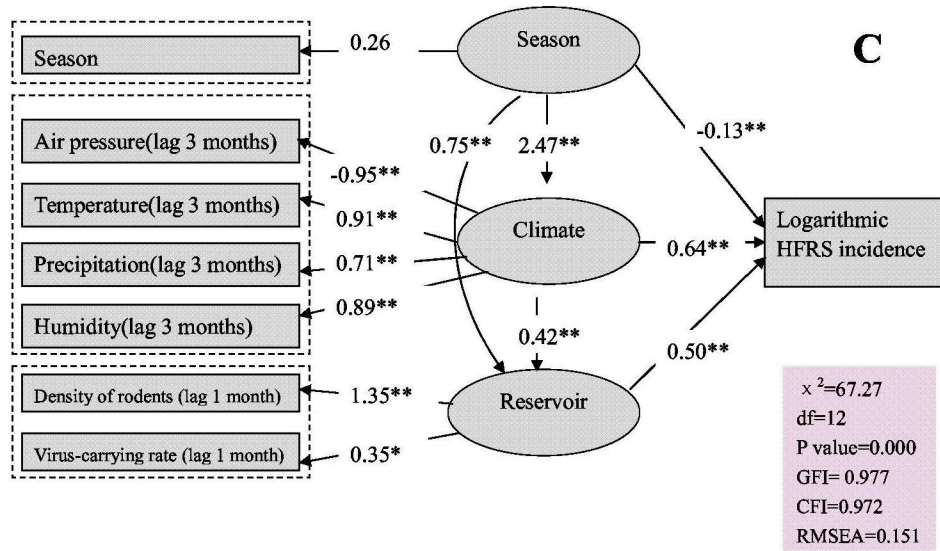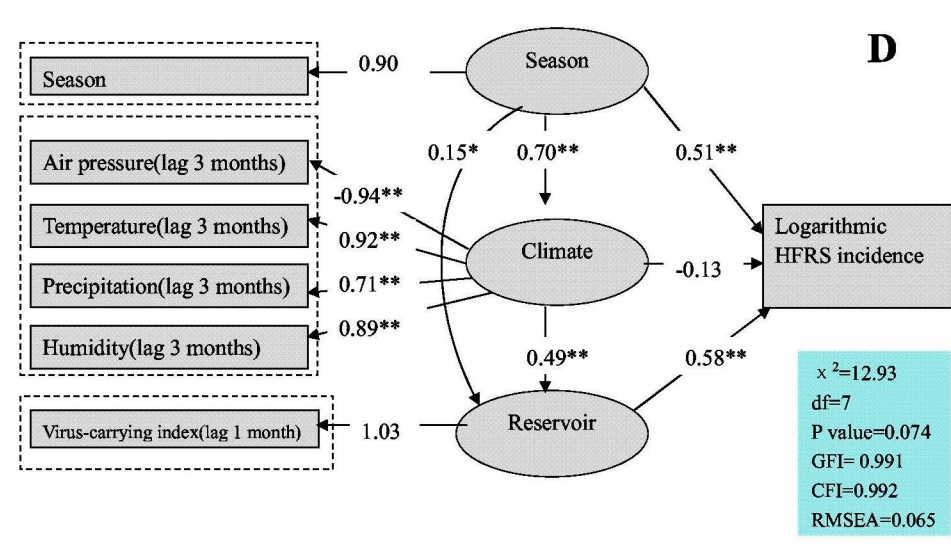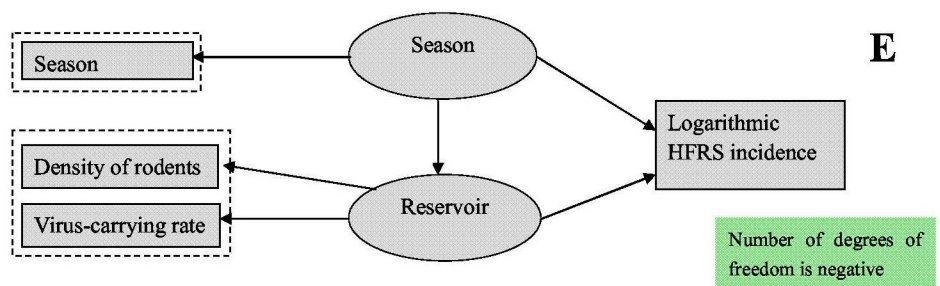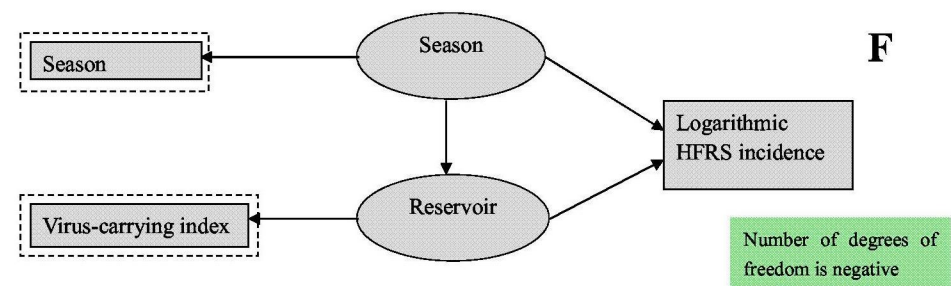

Supplement: MOESM5 [file 9449542]
